# Supplementary material
Source: PubMed Central journal article supplement (PMC2638528)
Supplement: ddn108_1.pdf [file ddn108_1.pdf]

**Table 1. Cholesterol absorption and plasma lipid and lipoprotein concentrations in a family segregating a defective NPC1L1 allele (R693C)**

| Subject  | Genotype | Age<br>(years) | Sex | Campesterol:<br>Lathosterol | Cholesterol<br>Absorption<br>Index | TC<br>(mg/dl) | TG<br>(mg/dl) | HDL-C<br>(mg/dl) | LDL-C<br>(mg/dl) |
|----------|----------|----------------|-----|-----------------------------|------------------------------------|---------------|---------------|------------------|------------------|
| DHS09-3  | +/+      | 37             | F   | 1.0                         | 2.7                                | 143           | 120           | 44               | 82               |
| DHS09-4  | +/+      | 13             | F   | 3.4                         | 7.2                                | 182           | 66            | 54               | 119              |
| DHS09-5  | +/+      | 7              | M   | 2.7                         | 4.6                                | 127           | 38            | 44               | 78               |
| DHS09-6  | +/+      | 7              | F   | 2.4                         | 9.0                                | 139           | 41            | 50               | 84               |
| DHS09-8  | +/+      | 19             | F   | 1.9                         | 3.8                                | 151           | 68            | 60               | 81               |
| DHS09-10 | +/+      | 11             | F   | 2.9                         | 3.8                                | 188           | 66            | 52               | 127              |
| DHS09-12 | +/+      | 58             | F   | 1.8                         | 4.1                                | 191           | 82            | 50               | 129              |
| DHS09-14 | +/+      | 33             | F   | 3.2                         | 5.6                                | 196           | 45            | 71               | 119              |
| DHS09-15 | +/+      | 15             | F   | 2.2                         | 5.5                                | 174           | 37            | 67               | 102              |
| DHS09-22 | +/+      | 50             | F   | 2.4                         | 4.4                                | 200           | 75            | 66               | 123              |
| DHS09-23 | +/+      | 28             | F   | 1.5                         | 4.0                                | 171           | 146           | 58               | 90               |
| DHS09-24 | +/+      | 14             | F   | 2.1                         | 4.1                                | 159           | 72            | 84               | 65               |
| DHS09-25 | +/+      | 8              | M   | 2.3                         | 7.2                                | 180           | 80            | 70               | 98               |
| DHS09-30 | +/+      | 30             | M   | 1.8                         | 3.9                                | 220           | 190           | 70               | 115              |
| Mean     |          | 24             |     | 2.3                         | 5.0                                | 173           | 80            | 60               | 101              |
| SD       |          | 16             |     | 0.7                         | 1.7                                | 26            | 44            | 12               | 21               |
| DHS09-1  | +/-      | 62             | M   | 0.4                         | 1.0                                | 223           | 355           | 38               | 120              |
| DHS09-2  | +/-      | 31             | M   | 1.3                         | 4.5                                | 148           | 69            | 49               | 89               |
| DHS09-7  | +/-      | 42             | F   | 0.8                         | 3.0                                | 208           | 258           | 40               | 125              |
| DHS09-9  | +/-      | 18             | F   | 3.5                         | 2.5                                | 152           | 70            | 62               | 80               |
| DHS09-11 | +/-      | 9              | F   | 1.7                         | 4.2                                | 191           | 84            | 52               | 127              |
| DHS09-13 | +/-      | 77             | F   | 0.5                         | 2.8                                | 361           | 666           | 56               | 171              |
| DHS09-16 | +/-      | 66             | F   | 2.8                         | 5.1                                | 254           | 111           | 87               | 153              |
| DHS09-17 | +/-      | 24             | M   | 1.0                         | 2.8                                | 191           | 80            | 49               | 130              |
| DHS09-18 | +/-      | 57             | F   | 0.7                         | 3.7                                | 212           | 121           | 69               | 126              |
| DHS09-19 | +/-      | 24             | F   | 1.3                         | 5.6                                | 121           | 56            | 49               | 64               |
| DHS09-20 | +/-      | 22             | M   | 1.8                         | 5.4                                | 152           | 162           | 58               | 66               |
| DHS09-21 | +/-      | 22             | M   | 1.3                         | 3.5                                | 196           | 47            | 53               | 137              |
| DHS09-26 | +/-      | 42             | F   | 1.2                         | 3.2                                | 162           | 88            | 65               | 84               |
| DHS09-27 | +/-      | 62             | M   | 1.6                         | 2.7                                | 158           | 94            | 45               | 99               |
| DHS09-28 | +/-      | 26             | F   | 1.8                         | 4.1                                | 139           | 39            | 53               | 81               |
| DHS09-29 | +/-      | 30             | F   | 2.1                         | 3.8                                | 153           | 39            | 76               | 72               |
| Mean     |          | 38             |     | 1.5                         | 3.6                                | 189           | 146           | 56               | 108              |
| SD       |          | 20             |     | 0.8                         | 1.2                                | 58            | 162           | 13               | 33               |

Genotype, + = 693R, - = 693C. Cholesterol absorption index = (deuterated cholesterol/total cholesterol)\*1000. TC = total cholesterol, TG = triglyceride, HDL-C = high density lipoprotein cholesterol, LDL-C = low density lipoprotein cholesterol

**Table 2. Cholesterol absorption and plasma lipid and lipoprotein concentrations in a family segregating a defective NPC1L1 allele (I647N)**

| Subject  | Genotype | Age<br>(years) | Sex | Campesterol:<br>Lathosterol | Cholesterol<br>Absorption<br>Index | TC<br>(mg/dl) | TG<br>(mg/dl) | HDL-C<br>(mg/dl) | LDL-C<br>(mg/dl) |
|----------|----------|----------------|-----|-----------------------------|------------------------------------|---------------|---------------|------------------|------------------|
| DHS14-4  | +/+      | 49             | F   | 1.5                         | 3.9                                | 164           | 59            | 42               | 110              |
| DHS14-5  | +/+      | 76             | F   | 1.1                         | 3.6                                | 138           | 75            | 54               | 68               |
| DHS14-8  | +/+      | 23             | F   | 1.7                         | 2.8                                | 200           | 67            | 47               | 139              |
| DHS14-9  | +/+      | 17             | F   | 1.2                         | 4.5                                | 199           | 45            | 46               | 144              |
| DHS14-10 | +/+      | 13             | F   | 4.2                         | 8.3                                | 191           | 35            | 57               | 126              |
| DHS14-11 | +/+      | 37             | F   | 1.1                         | 3.0                                | 169           | 45            | 48               | 112              |
| DHS14-12 | +/+      | 18             | F   | 1.6                         | 3.7                                | 181           | 95            | 47               | 115              |
| DHS14-13 | +/+      | 26             | F   | 1.0                         | 2.6                                | 138           | 76            | 39               | 84               |
| DHS14-15 | +/+      | 6              | F   | 1.8                         | 8.1                                | 151           | 47            | 57               | 84               |
| DHS14-17 | +/+      | 31             | F   | 1.2                         | 4.9                                | 121           | 40            | 47               | 66               |
| DHS14-18 | +/+      | 53             | M   | 1.1                         | 3.2                                | 131           | 43            | 51               | 72               |
| DHS14-19 | +/+      | 50             | M   | 1.5                         | 5.8                                | 113           | 65            | 50               | 50               |
| DHS14-20 | +/+      | 56             | M   | 1.5                         | 3.3                                | 108           | 67            | 62               | 33               |
| DHS14-22 | +/+      | 15             | M   | 1.4                         | 2.4                                | 113           | 27            | 38               | 69               |
| DHS14-23 | +/+      | 42             | F   | 2.7                         | 3.7                                | 176           | 110           | 62               | 92               |
| DHS14-26 | +/+      | 27             | M   | 1.3                         | 4.1                                | 176           | 68            | 45               | 117              |
| DHS14-27 | +/+      | 13             | F   | 1.3                         | 6.1                                | 122           | 55            | 37               | 74               |
| DHS14-28 | +/+      | 12             | M   | 2.2                         | 5.5                                | 168           | 55            | 44               | 112              |
| DHS14-29 | +/+      | 31             | F   | 2.2                         | 9.6                                | 157           | 44            | 43               | 105              |
| DHS14-30 | +/+      | 48             | F   | 1.5                         | 5.1                                | 183           | 63            | 52               | 118              |
| DHS14-31 | +/+      | 34             | M   | 1.5                         | 3.5                                | 182           | 157           | 58               | 93               |
| DHS14-32 | +/+      | 10             | F   | 1.2                         | 3.0                                | 137           | 71            | 47               | 75               |
| DHS14-33 | +/+      | 15             | M   | 1.9                         | 3.4                                | 130           | 41            | 48               | 73               |
| DHS14-35 | +/+      | 16             | M   | 3.1                         | 3.4                                | 141           | 24            | 45               | 91               |
| DHS14-37 | +/+      | 11             | F   | 1.9                         | 4.1                                | 139           | 29            | 36               | 97               |
| DHS14-38 | +/+      | 11             | M   | 2.0                         | 7.7                                | 137           | 108           | 40               | 75               |
| Mean     |          | 28             |     | 1.7                         | 4.6                                | 153           | 62            | 48               | 92               |
| SD       |          | 18             |     | 0.7                         | 1.9                                | 28            | 30            | 7                | 27               |
| DHS14-2  | +/-      | 66             | F   | 0.9                         | 2.1                                | 177           | 57            | 63               | 102              |
| DHS14-3  | +/-      | 72             | F   | 0.7                         |                                    | ND            | ND            | ND               | ND               |
| DHS14-6  | +/-      | 69             | M   | 1.0                         | 2.5                                | 130           | 141           | 36               | 65               |
| DHS14-7  | +/-      | 27             | F   | 1.1                         | 4.3                                | 131           | 55            | 39               | 80               |
| DHS14-14 | +/-      | 23             | F   | 1.1                         | 3.7                                | 171           | 66            | 46               | 111              |
| DHS14-16 | +/-      | 44             | M   | 0.8                         | 3.2                                | 147           | 98            | 47               | 81               |
| DHS14-24 | +/-      | 42             | M   | 1.4                         | 3.3                                | 165           | 32            | 64               | 94               |
| DHS14-25 | +/-      | 29             | M   | 1.2                         | 4.1                                | 163           | 44            | 47               | 107              |
| DHS14-34 | +/-      | 55             | M   | 1.4                         | 3.8                                | 173           | 159           | 49               | 92               |
| DHS14-36 | +/-      | 14             | F   | 0.6                         | 3.4                                | 180           | 78            | 42               | 123              |
| Mean     |          | 44             |     | 1.0                         | 3.4                                | 160           | 81            | 48               | 95               |
| SD       |          | 21             |     | 0.3                         | 0.7                                | 19            | 44            | 10               | 18               |
| DHS14-1  | -/-      | 58             | F   | 0.7                         | 1.4                                | 197           | 236           | 59               | 90               |
| DHS14-21 | -/-      | 61             | F   | 0.6                         | 1.6                                | 166           | 44            | 75               | 81               |

Genotype, + = 647I, - = 647N. Cholesterol absorption index = (deuterated cholesterol/total cholesterol)\*1000. TC = total cholesterol, TG = triglyceride, HDL-C = high density lipoprotein cholesterol, LDL-C = low density lipoprotein cholesterol

Supplementary Figure 1

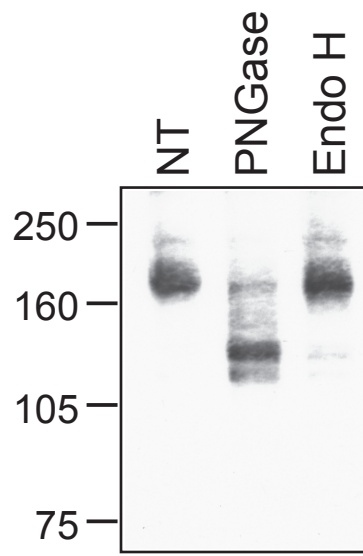

**Supplementary Figure 1.**

Glycosylation of NPC1L1. CHO-K1 cells were transiently transfected with an expression construct encoding NPC1L1. Cell membranes were prepared as described in the Methods, heated in 0.5% SDS, 1 mM -mercaptoethanol (95 °C, 5 min), and incubated in the presence or absence of 10 units of N-glycosidase F (PNGase F, Calbiochem) in 60 mM Tris, pH 8.6, and 1% (w/v) Triton X-100. Samples were diluted with protein sample buffer, heated to 95 °C for 5 min, and subjected to SDS-PAGE and immunoblot analysis using a rabbit anti-NPC1L1 antiserum.

Supplementary Figure 2

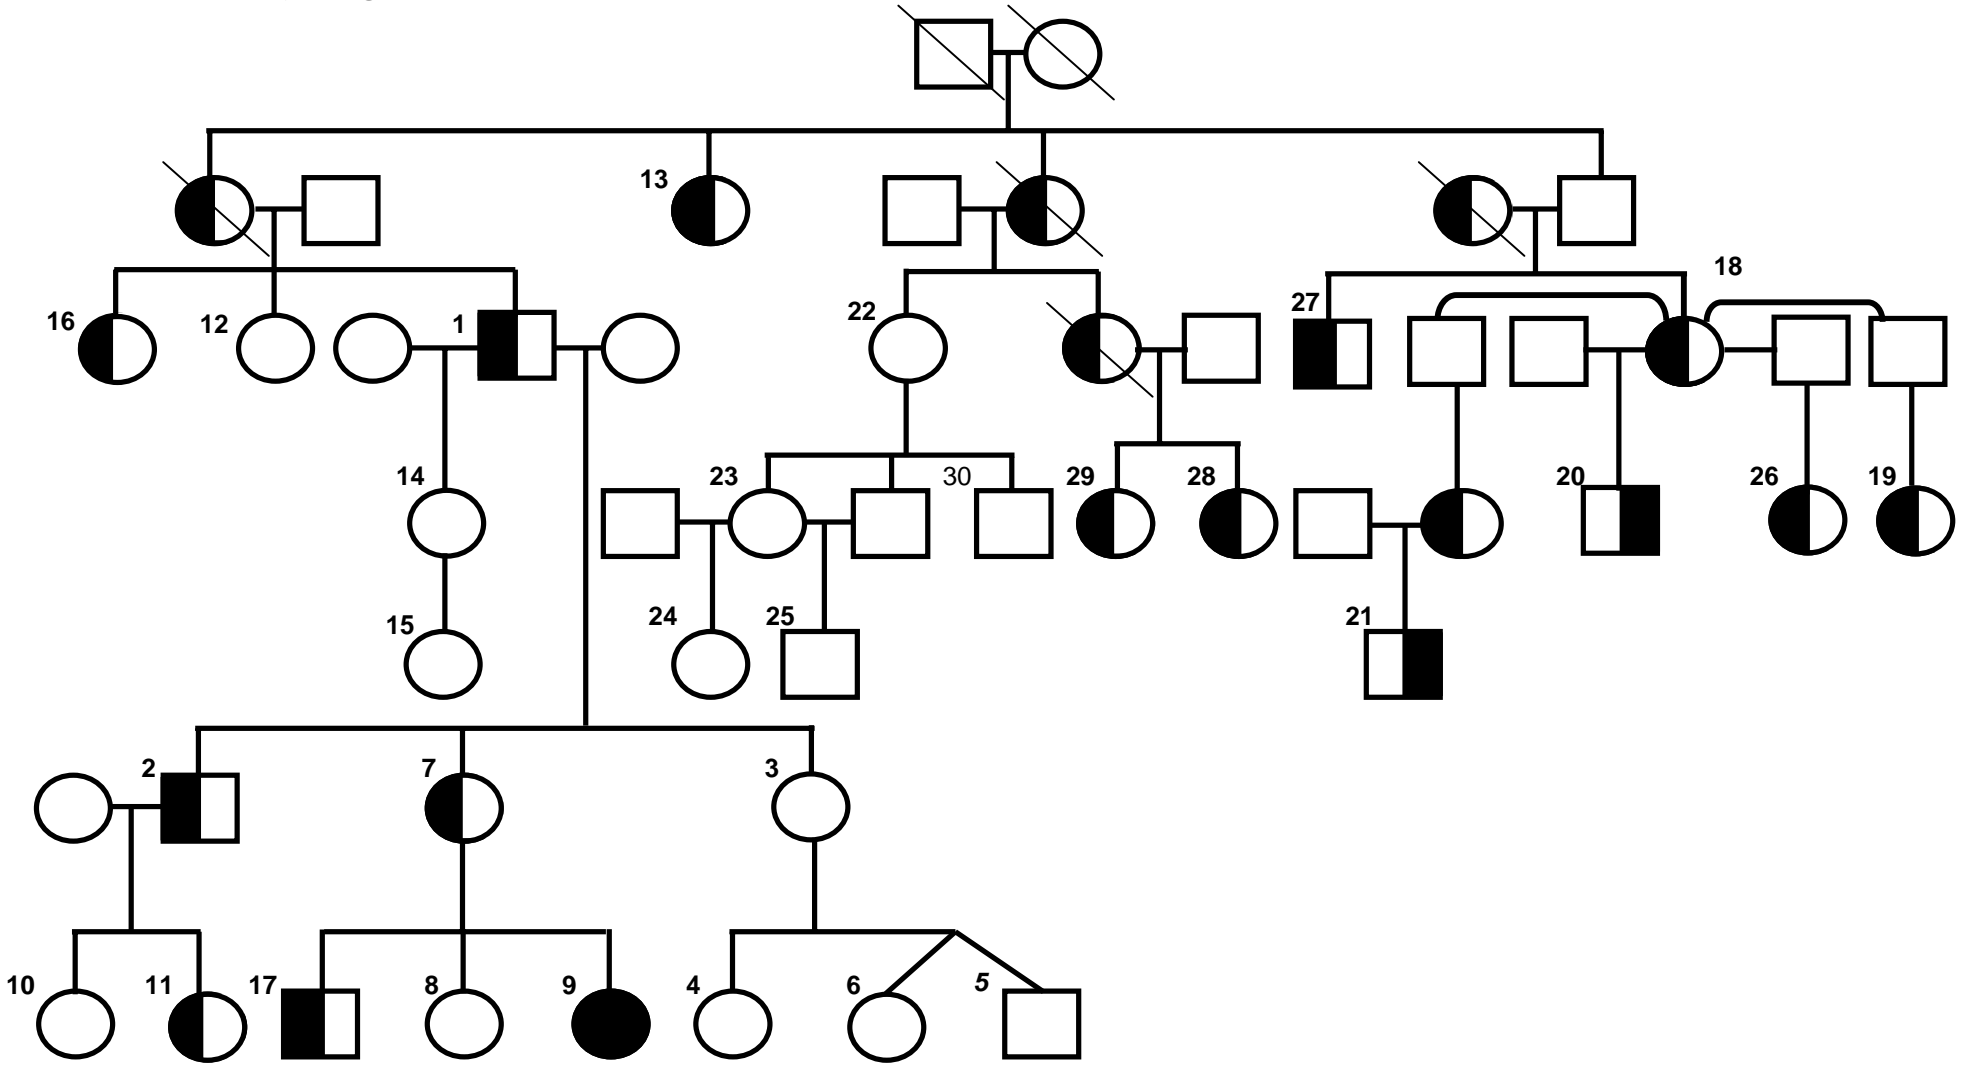

Supplementary Figure 2. Pedigree of family DHS-9. Numbers on the pedigree correspond to the subject identities in Supplementary Table 2.

Supplementary Figure 3

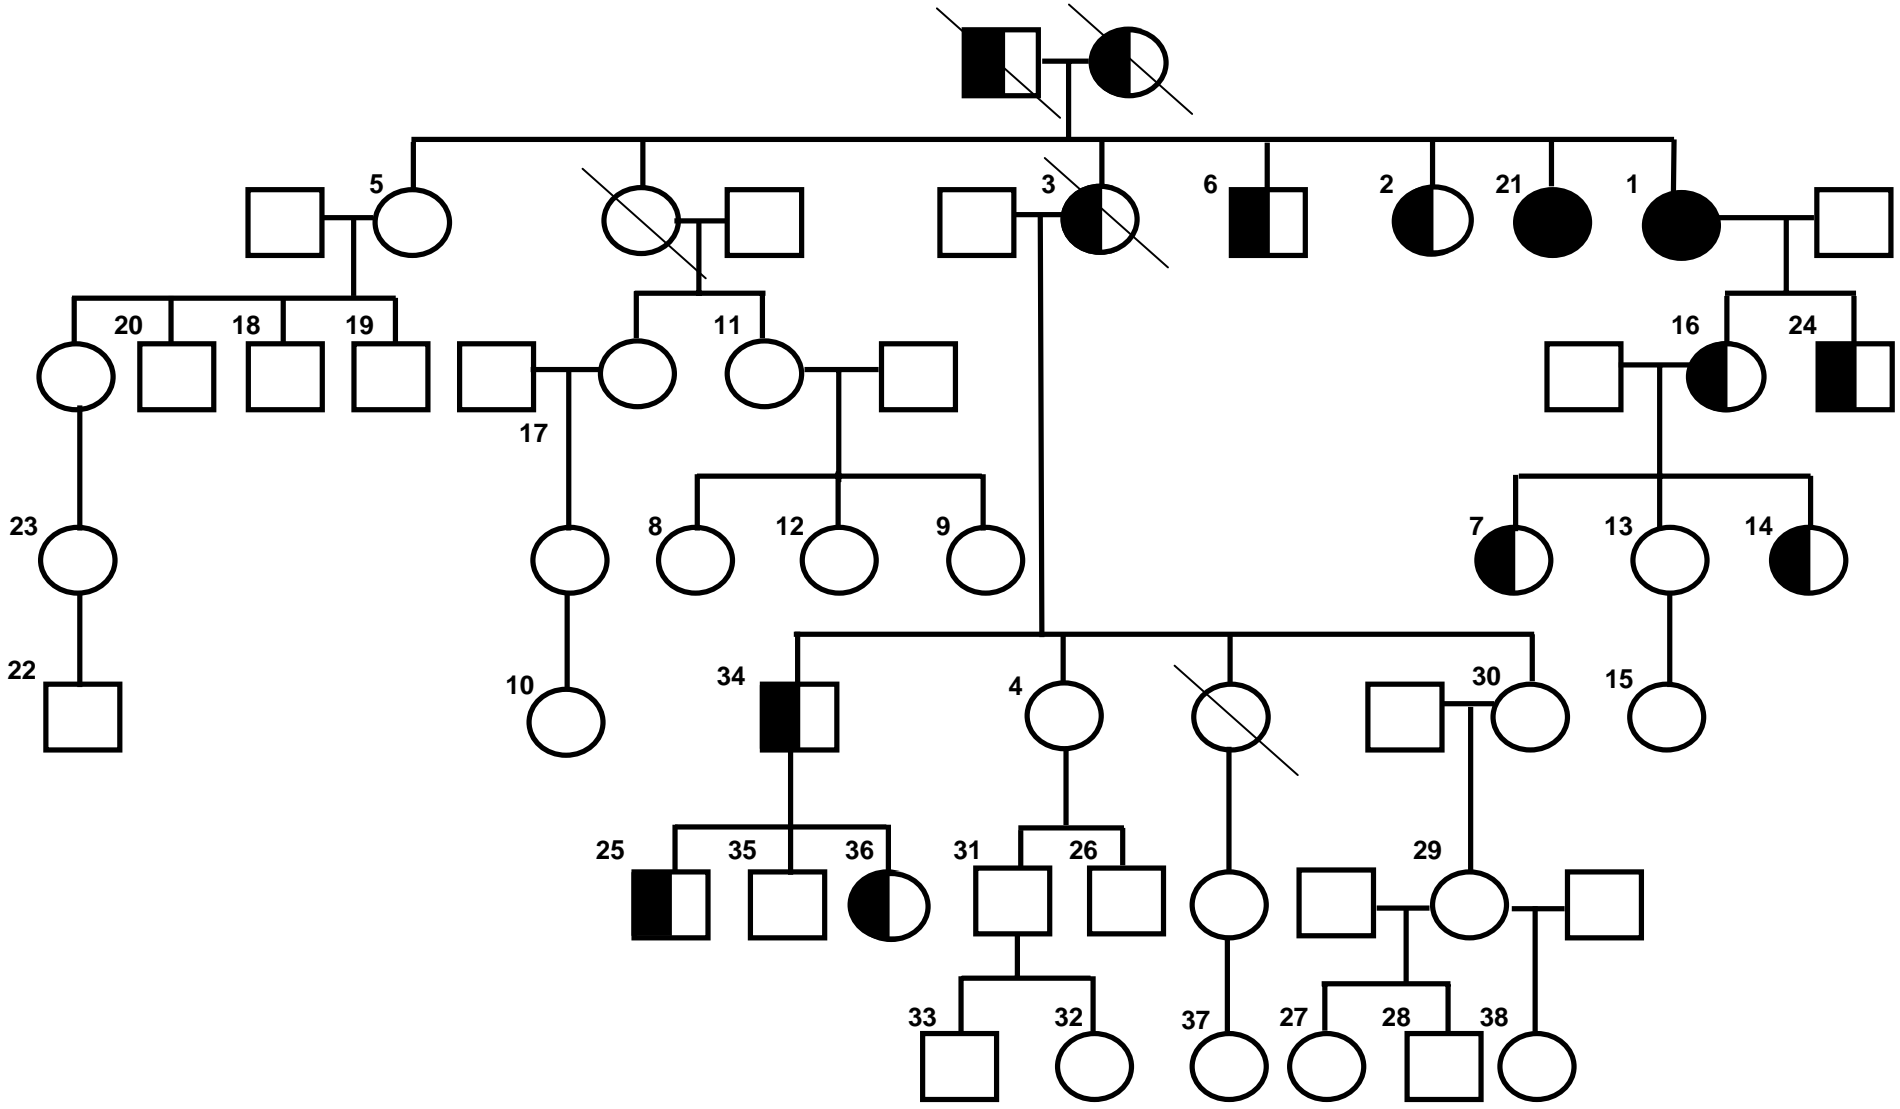



Supplementary Figure 3. Pedigree of family DHS-14. Numbers on the pedigree correspond to the subject identities in Supplementary Table 2.
